# Supplementary material for: Use of a neoprene binding to reduce giant omphaloceles followed by delayed closure
Source: HighWire-hosted journal article supplement (doi:10.1136/wjps-2021-000284), 2021-09-01
Supplement: wjps-2021-000284supp008_data_supplement.pdf [file wjps-2021-000284supp008_data_supplement.pdf]

## APPENDIX 2: PARENTAL SURVEY

## PARENT SURVEY

1. What is your relationship to the child that underwent Omphalocele repair?

---

2. Prior to the surgery, what expectations did you have in regard to outcome? *(Please circle one, but then feel free to add other comments if necessary)*

- a) Death
- b) A difficult post-operative recovery with many long-term complications
- c) A difficult post-operative recovery with few/no long-term complications
- d) An easy post-operative recovery with many long-term complications
- e) An easy post-operative recovery with few/no long-term complications

Other comments:

---

3. Are you satisfied with the surgery?  
*Please circle a number. (1: dissatisfied - 10: completely satisfied)*

1      2      3      4      5      6      7      8      9      10

Other comments:

---

4. Were there any aspects of the surgery or recovery that went differently than you expected? Better/worse?

---

5. How did the overall outcome compare to your expectations prior to surgery? *Please circle a number. (1: worse than expected- 5: exactly as expected- 10: better than expected)*

1      2      3      4      5      6      7      8      9      10

Other comments:

---

6. How do you think your child is doing now?  
*Please circle a number (1: not very well and 10: very well)*

1      2      3      4      5      6      7      8      9      10

Other comments:

---

7. Has having an omphalocele negatively affected your child's quality of life?  
*Please circle a number. (1: very much - 10: not at all)*

1      2      3      4      5      6      7      8      9      10

Other comments:

---

8. Has having an infant with an omphalocele negatively affected your quality of life?

*Please circle a number. (1: very much - 10: not at all)*

1      2      3      4      5      6      7      8      9      10

Other comments:

---

9. Is there anything else you wish to add?

---
