# Supplementary figures and images for: Use of a neoprene binding to reduce giant omphaloceles followed by delayed closure
Source: HighWire-hosted journal article supplement (doi:10.1136/wjps-2021-000284), 2021-09-01

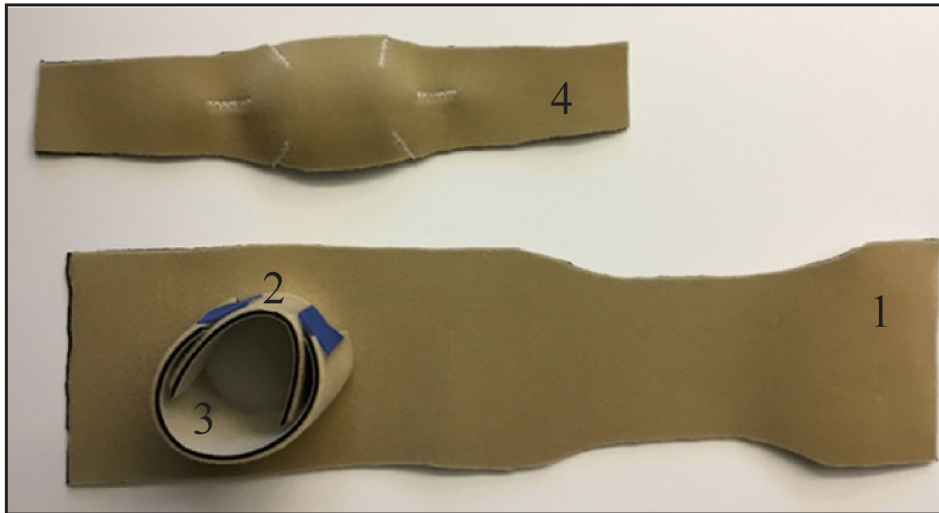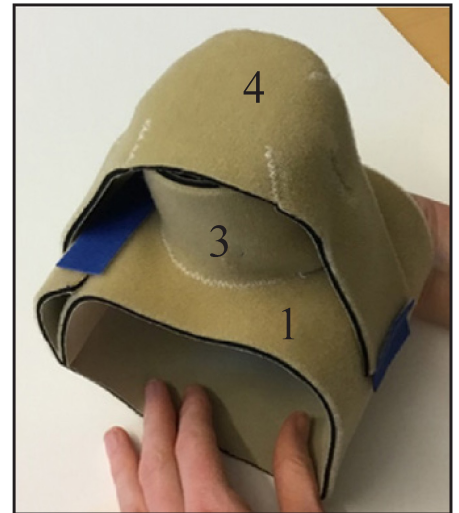

Supplement: wjps-2021-000284supp005_data_supplement.pdf [file wjps-2021-000284supp005_data_supplement.pdf]
